# Supplementary material for: Hedgehog, Chamomile and Multipetal Polymeric Structures on the Nanoparticle Surface: Theoretical Insights
Source: MDPI journal article supplement (doi:10.3390/polym14204358), 2022-10-16
Supplement: s1 [file s1]

# Supplementary Materials

## for

**"Hedgehog, chamomile and multipetal polymeric structures on the nanoparticle surface: theoretical insights" by A. S. Ushakova and V. V. Vasilevskaya**

### 1. Helfrich energy of steric interaction between neighboring components

The free energy of steric interaction of neighboring basic components (spikes, loops, or petals) in Helfrich approximation is written as:

$$f_{ster}(\varphi)NM = \frac{3\pi^2}{k_c} \frac{K}{2} \left[ \int_{S_{side}} \frac{dS_{side}}{(d(l))^2} \right], \quad (S1)$$

where  $d_i(l)$  is distance between neighboring basic components (Fig. S1); and integral is taken over their surface  $S_{side}$ .

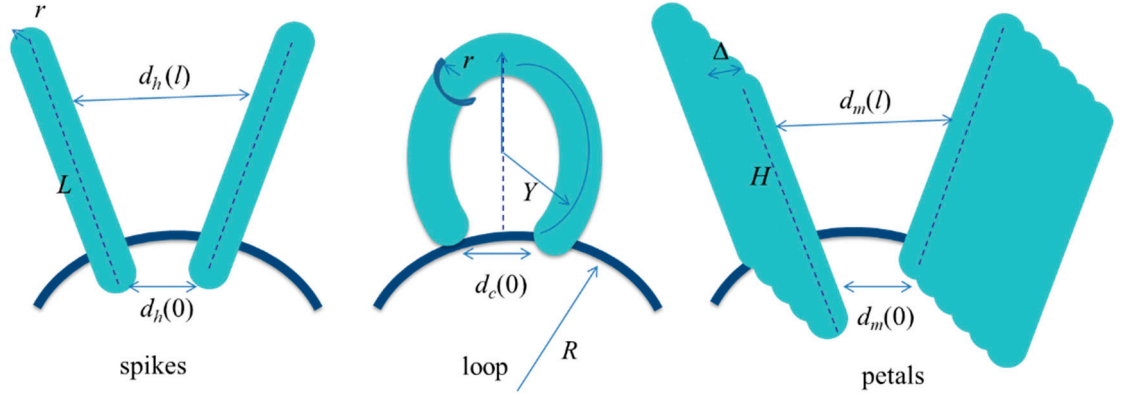

**Figure S1.** Schematic presentation of geometric relations: spike, loop and petal

#### Hedgehog

At uniform distribution of  $K$  spikes, the distance  $d_H(l)$  between neighbors is:

$$d_h(l) = d_h(0)(R + L)/R, \quad l = 0 \dots L$$

where  $d_h(0)$  is distance between spikes on the nanoparticle surface:  $K\pi d(0)^2 = 4\pi R^2 - K\pi r^2$

$$d(0) = \sqrt{\frac{4R^2}{K} - r^2} + r \approx \sqrt{\frac{4R^2}{K}}$$

Helfrich free energy of interaction is:

$$f_{ster.h}(\varphi)NM = \frac{3\pi^2}{k_c} \frac{K^2}{2} \int_R^{R+L} \frac{2\pi r dl}{(R+l)^2} = \frac{3\pi^3}{k_c} \frac{K^2 r L}{4R(R+L)} \approx \frac{3\pi^3}{4k_c} \frac{K^2 r}{R}, \quad L \gg R. \quad (S2)$$

#### Chamomile

Within the framework of the proposed model (see Fig. S1), up to numerical factors, the interaction energy  $f_{ster.c}$  of chamomile loops at  $L \gg R$  coincides with the expression (S2)

## Multipetal structure

In case of symmetric position of  $K$  petals relative to an arbitrary equatorial line, the distance between them is:

$$d_m(l) = d_m(0)l/R = 2\pi l/K, l = R \dots H$$

where  $d_m(0) = 2\pi R/K$  is distance between petals at nanoparticle surface.

Free energy  $f_{ster.m}$  is

$$f_{ster.m}(\varphi)NM = \frac{6\pi^2}{k_c} \frac{K^3}{4\pi^2} \int_R^H \frac{2\pi dz}{(l)^2} = \frac{3\pi}{2k_c} K^3 L n \frac{H}{R}, \quad (S3)$$

Taking into account that flat petals have surface area:  $S_0 = \pi(H^2 - R^2) = \frac{NMv^{2/3}}{\pi K R^2 \varphi \Delta}$ , where  $\Delta$  is thickness,

we obtain eq. (12).

## 2. Helfrich energy of aggregate bending

In general, the Helfrich free energy of bending is written as:

$$\frac{df_{curv}}{dS_{side}} NM = \frac{k_1}{v^{1/3}} \left( \frac{1}{R_1} + \frac{1}{R_2} \right) + k_2 \left( \frac{1}{R_1^2} + \frac{1}{R_2^2} \right) + \frac{k_G}{R_1 R_2}, \quad (S4)$$

where  $R_1$  and  $R_2$  are curvature radii;  $k_c$ ,  $k_1$  and  $k_G$  are elastic spontaneous, mean and Gaussian  $k_G$  bending moduli ( $k_c > 0$ ;  $k_1 > 0$ ;  $k_G < 0$ ).

## Hedgehog

For straight and long cylindrical spikes  $R_1 = r$  and  $R_2 = \infty$ , and free energy of bending is:

$$\frac{df_{curv.h}}{dS_{side}} NM = \frac{k_1}{v^{1/3} r} + \frac{k_2}{r^2}, \quad (S5)$$

$$\text{and } f_{curv.h}(\varphi) = \left( \frac{2k_1 v^{1/3}}{r} + \frac{k_2 v^{2/3}}{2r^2} \right) \frac{S_{side}}{NM} = \frac{v}{r^2 \varphi} \left( \frac{2k_1}{v^{1/3}} + \frac{k_2}{r} \right)$$

## Chamomile

Two characteristic curvatures of loop can be distinguished. The curvature of loop cross-section  $R_1 = r$  and curvature  $R_2$  of loops as a whole:  $Y = L / (2\sqrt{1 - 4R^2/L^2 K})$

The surface area of loops is:  $S_{side} = 2\pi Y \cdot 2L / Y$ , the bending free energy is:

$$f_{curv.c} NM = 4\pi K \left( \frac{k_1}{v^{1/3}} \left( L + 2r \sqrt{1 - \frac{4R^2}{L^2 K}} \right) + k_2 \left( \frac{L}{r} + \frac{2r}{L} \left( 1 - \frac{4R^2}{L^2 K} \right) \right) + 2k_G \sqrt{1 - \frac{4R^2}{L^2 K}} \right), \quad (S6)$$

taken that  $L = NMv/(K\varphi\pi^2)$ , and neglecting terms  $\sim 1/N^2$  we obtain:

$$f_{curv.c}(\varphi) = \frac{4k_1 v^{2/3}}{\varphi r^2} + \frac{8\pi K}{NM} \left( \frac{k_1 r}{v^{1/3}} + k_G \right) + \frac{4k_2 v}{\varphi r^3}$$

### **Multipetal structure**

With the accuracy adopted in these calculations, the free energy of the bending of the petals can be neglected [35].
